# Supplementary material
Source: Springer Nature journal article supplement (https://www.springermedizin.de/resource/supplementary/12958_2012_983_MOESM4_ESM.pdf/9566560)

**A**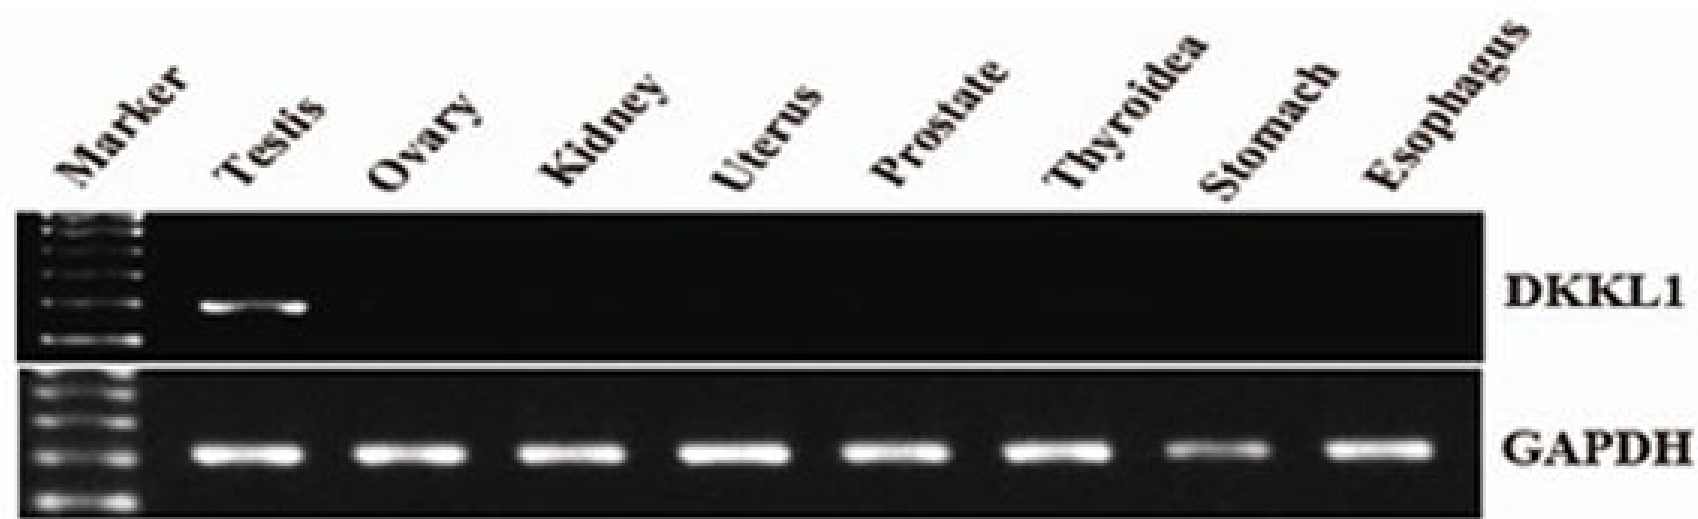**B**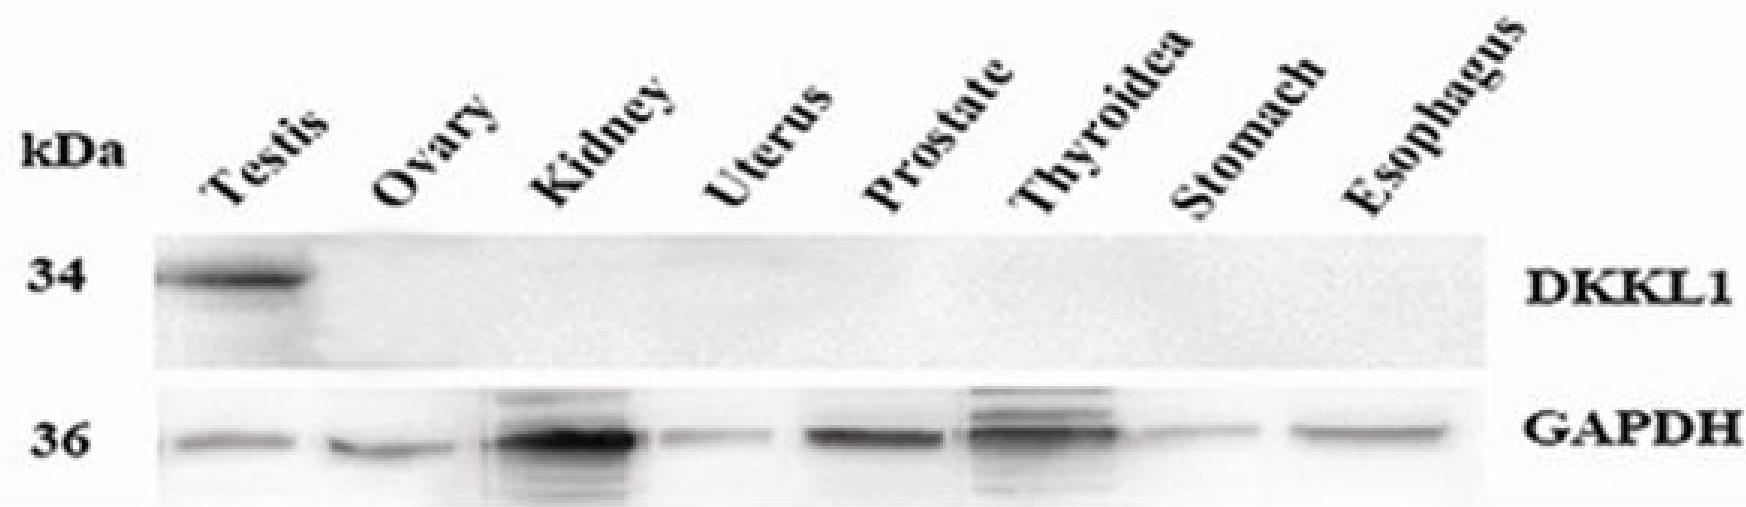

Figure 4

Supplement: MOESM4 [file 9566560]
